# Supplementary material
Source: publisher site journal article supplement (https://www.dovepress.com/article/550346)
Supplement: Supplementary file 1 [file 550346%20Revised%20%252509Supplementary%20Material.pdf]

|               |      |     |                 |        |                 |        |                 |        |
|---------------|------|-----|-----------------|--------|-----------------|--------|-----------------|--------|
| No            | 3732 | 738 | Ref             |        | Ref             |        | Ref             |        |
| Yes           | 307  | 113 | 1.11(1.07–1.15) | <0.001 | 1.09(1.05–1.13) | <0.001 | 1.06(1.01–1.11) | 0.017  |
| Waist pain    |      |     |                 |        |                 |        |                 |        |
| No            | 3318 | 646 | Ref             |        | Ref             |        | Ref             |        |
| Yes           | 721  | 205 | 1.06(1.03–1.09) | <0.001 | 1.07(1.04–1.10) | <0.001 | 1.04(1.00–1.08) | 0.011  |
| Buttocks pain |      |     |                 |        |                 |        |                 |        |
| No            | 3929 | 812 | Ref             |        | Ref             |        | Ref             |        |
| Yes           | 110  | 39  | 1.09(1.03–1.16) | 0.004  | 1.08(1.01–1.15) | 0.018  | 1.03(0.95–1.10) | 0.496  |
| Leg pain      |      |     |                 |        |                 |        |                 |        |
| No            | 3444 | 657 | Ref             |        | Ref             |        | Ref             |        |
| Yes           | 595  | 194 | 1.09(1.06–1.12) | <0.001 | 1.09(1.06–1.12) | <0.001 | 1.04(1.01–1.08) | 0.023  |
| Knees pain    |      |     |                 |        |                 |        |                 |        |
| No            | 3566 | 691 | Ref             |        | Ref             |        | Ref             |        |
| Yes           | 473  | 160 | 1.09(1.06–1.13) | <0.001 | 1.09(1.06–1.13) | <0.001 | 1.07(1.03–1.11) | <0.001 |
| Ankle pain    |      |     |                 |        |                 |        |                 |        |
| No            | 3844 | 780 | Ref             |        | Ref             |        | Ref             |        |
| Yes           | 195  | 71  | 1.10(1.05–1.16) | <0.001 | 1.09(1.04–1.14) | <0.001 | 1.04(0.99–1.10) | 0.122  |
| Toes pain     |      |     |                 |        |                 |        |                 |        |
| No            | 3922 | 811 | Ref             |        | Ref             |        | Ref             |        |
| Yes           | 117  | 40  | 1.09(1.02–1.15) | 0.007  | 1.06(1.00–1.13) | 0.046  | 0.99(0.93–1.07) | 0.870  |
| Neck pain     |      |     |                 |        |                 |        |                 |        |
| No            | 3857 | 762 | Ref             |        | Ref             |        | Ref             |        |
| Yes           | 182  | 89  | 1.18(1.12–1.23) | <0.001 | 1.15(1.09–1.20) | <0.001 | 1.10(1.04–1.16) | <0.001 |
| Pain_level    |      |     |                 |        |                 |        |                 |        |
| 0None         | 2338 | 384 | Ref             |        | Ref             |        | Ref             |        |
| 1A Little     | 789  | 180 | 1.05(1.02–1.07) | 0.002  | 1.05(1.02–1.08) | <0.001 | 1.03(0.99–1.06) | 0.128  |
| 2Some         | 434  | 115 | 1.07(1.03–1.11) | <0.001 | 1.08(1.05–1.12) | <0.001 | 1.06(1.02–1.10) | 0.005  |
| 3Quite ABit   | 317  | 104 | 1.11(1.07–1.16) | <0.001 | 1.12(1.08–1.17) | <0.001 | 1.10(1.05–1.15) | <0.001 |
| 4A Lot        | 161  | 68  | 1.17(1.11–1.23) | <0.001 | 1.20(1.14–1.26) | <0.001 | 1.15(1.08–1.22) | <0.001 |
| Pain_number   |      |     | 1.02(1.01–1.02) | <0.001 | 1.02(1.01–1.02) | <0.001 | 1.01(1.00–1.02) | <0.001 |

Supplementary Table S2 Odds ratios and 95% confidence intervals for CVD by persistent chronic pain in the longitudinal analysis.

|                 | CVD  |     | Model 1         | P-value | Model 2         | P-value | Model 3         | P-value |
|-----------------|------|-----|-----------------|---------|-----------------|---------|-----------------|---------|
|                 | No   | Yes |                 |         |                 |         |                 |         |
| Chronic Pain    |      |     |                 |         |                 |         |                 |         |
| No              | 2165 | 347 | Ref             |         | Ref             |         | Ref             |         |
| Yes             | 1443 | 337 | 1.05(1.03–1.07) | <0.001  | 1.04(1.02–1.07) | <0.001  | 1.02(0.99–1.05) | 0.282   |
| P-Chronic Pain  |      |     |                 |         |                 |         |                 |         |
| No              | 2729 | 447 | Ref             |         | Ref             |         | Ref             |         |
| Yes             | 879  | 237 | 1.08(1.05–1.11) | <0.001  | 1.07(1.04–1.10) | <0.001  | 1.05(1.00–1.08) | 0.012   |
| P-Head pain     |      |     |                 |         |                 |         |                 |         |
| No              | 3357 | 613 |                 |         |                 |         |                 |         |
| Yes             | 192  | 62  | 1.09(1.04–1.15) | <0.001  | 1.09(1.04–1.15) | <0.001  | 1.05(0.99–1.12) | 0.098   |
| P-Shoulder pain |      |     |                 |         |                 |         |                 |         |
| No              | 3369 | 621 | Ref             |         | Ref             |         | Ref             |         |
| Yes             | 185  | 55  | 1.09(1.03–1.15) | 0.002   | 1.08(1.02–1.14) | 0.006   | 1.03(0.96–1.10) | 0.454   |
| P-Arm pain      |      |     |                 |         |                 |         |                 |         |
| No              | 3456 | 639 | Ref             |         | Ref             |         | Ref             |         |
| Yes             | 111  | 39  | 1.09(1.02–1.17) | 0.012   | 1.09(1.02–1.17) | 0.016   | 1.05(0.97–1.14) | 0.226   |
| P-Wrist pain    |      |     |                 |         |                 |         |                 |         |
| No              | 3528 | 665 | Ref             |         | Ref             |         | Ref             |         |
| Yes             | 67   | 19  | 1.03(0.94–1.13) | 0.495   | 1.00(0.91–1.10) | 0.975   | 0.98(0.88–1.10) | 0.772   |
| P-Fingers pain  |      |     |                 |         |                 |         |                 |         |
| No              | 3500 | 654 | Ref             |         | Ref             |         | Ref             |         |
| Yes             | 87   | 23  | 1.04(0.96–1.13) | 0.299   | 1.03(0.95–1.12) | 0.425   | 0.97(0.87–1.07) | 0.525   |
| P-Chest pain    |      |     |                 |         |                 |         |                 |         |
| No              | 3559 | 660 | Ref             |         | Ref             |         | Ref             |         |
| Yes             | 39   | 18  | 1.15(1.04–1.28) | 0.006   | 1.13(1.02–1.25) | 0.022   | 1.10(0.96–1.25) | 0.168   |

|                    |      |     |                 |        |                 |        |                 |       |
|--------------------|------|-----|-----------------|--------|-----------------|--------|-----------------|-------|
| P-Stomach pain     |      |     |                 |        |                 |        |                 |       |
| No                 | 3496 | 653 | Ref             |        | Ref             |        | Ref             |       |
| Yes                | 86   | 26  | 1.05(1.97–1.13) | 0.236  | 1.07(0.98–1.15) | 0.114  | 1.06(0.96–1.6)  | 0.274 |
| P-Back pain        |      |     |                 |        |                 |        |                 |       |
| No                 | 3465 | 634 | Ref             |        | Ref             |        | Ref             |       |
| Yes                | 105  | 40  | 1.09(1.02–1.17) | 0.010  | 1.07(1.00–1.15) | 0.045  | 1.04(0.96–1.13) | 0.300 |
| P-Waist pain       |      |     |                 |        |                 |        |                 |       |
| No                 | 3103 | 542 | Ref             |        | Ref             |        | Ref             |       |
| Yes                | 396  | 123 | 1.10(1.06–1.14) | <0.001 | 1.09(1.05–1.14) | <0.001 | 1.08(1.03–1.13) | 0.001 |
| P-Buttocks pain    |      |     |                 |        |                 |        |                 |       |
| No                 | 3563 | 672 | Ref             |        | Ref             |        | Ref             |       |
| Yes                | 32   | 10  | 1.04(0.92–1.18) | 0.522  | 1.00(1.89–1.14) | 0.895  | 1.00(0.86–1.15) | 0.954 |
| P-Leg pain         |      |     |                 |        |                 |        |                 |       |
| No                 | 3256 | 581 | Ref             |        | Ref             |        | Ref             |       |
| Yes                | 273  | 83  | 1.08(1.03–1.13) | <0.001 | 1.07(1.02–1.12) | 0.002  | 1.02(0.97–1.08) | 0.403 |
| P-Knees pain       |      |     |                 |        |                 |        |                 |       |
| No                 | 3300 | 598 | Ref             |        | Ref             |        | Ref             |       |
| Yes                | 251  | 71  | 1.07(1.02–1.12) | 0.003  | 1.07(1.02–1.12) | 0.004  | 1.03(0.97–1.09) | 0.349 |
| P-Ankle pain       |      |     |                 |        |                 |        |                 |       |
| No                 | 3501 | 662 | Ref             |        | Ref             |        | Ref             |       |
| Yes                | 85   | 16  | 1.01(0.93–1.10) | 0.749  | 1.01(0.93–1.10) | 0.811  | 1.00(0.91–1.11) | 0.921 |
| P-Toes pain        |      |     |                 |        |                 |        |                 |       |
| No                 | 3556 | 670 | Ref             |        | Ref             |        | Ref             |       |
| Yes                | 40   | 11  | 1.05(0.94–1.17) | 0.376  | 1.07(0.95–1.19) | 0.273  | 1.06(0.92–1.22) | 0.442 |
| P-Neck pain        |      |     |                 |        |                 |        |                 |       |
| No                 | 3524 | 653 | Ref             |        | Ref             |        | Ref             |       |
| Yes                | 67   | 26  | 1.17(1.07–1.27) | <0.001 | 1.18(1.09–1.29) | 0.008  | 1.10(0.99–1.22) | 0.078 |
| Chronic Pain state |      |     |                 |        |                 |        |                 |       |
| 1None pain         | 1758 | 285 | Ref             |        | Ref             |        | Ref             |       |

|                                           |      |     |                 |        |                 |        |                 |       |
|-------------------------------------------|------|-----|-----------------|--------|-----------------|--------|-----------------|-------|
| 2none or<br>single<br>--more site<br>pain | 298  | 47  | 0.99(0.96–1.04) | 0.877  | 0.99(0.95–1.03) | 0.577  | 0.98(0.94–1.03) | 0.532 |
| 3Persistent-<br>multisite pain            | 336  | 104 | 1.10(1.06–1.14) | <0.001 | 1.10(1.06–1.14) | <0.001 | 1.06(1.01–1.11) | 0.020 |
| 4multisite<br>pain-less site<br>pain      | 292  | 66  | 1.05(1.00–1.09) | 0.031  | 1.03(0.99–1.08) | 0.110  | 1.00(0.95–1.05) | 0.883 |
| Pain_level                                |      |     |                 |        |                 |        |                 |       |
| 0                                         | 1749 | 282 | Ref             |        | Ref             |        | Ref             |       |
| 1A Little                                 | 590  | 111 | 1.02(0.99–1.05) | 0.224  | 1.01(0.98–1.05) | 0.420  | 0.99(0.96–1.03) | 0.758 |
| 2Some                                     | 311  | 75  | 1.06(1.02–1.10) | 0.006  | 1.05(1.01–1.09) | 0.021  | 1.02(0.98–1.07) | 0.333 |
| 3Quite A Bit                              | 200  | 67  | 1.12(1.07–1.17) | <0.001 | 1.12(1.07–1.17) | <0.001 | 1.08(1.02–1.14) | 0.013 |
| 4A Lot                                    | 110  | 31  | 1.08(1.02–1.15) | 0.011  | 1.08(1.01–1.15) | 0.021  | 1.05(0.97–1.13) | 0.266 |

**Supplementary Table S3. Results of Interaction Analyses Testing Effect Modification**

| Pain Phenotype             | Effect Modifier   | LRT<br>P-value | Interpretation                | Sample<br>Size |
|----------------------------|-------------------|----------------|-------------------------------|----------------|
| Chronic persistent<br>pain | Age               | 0.563          | No significant<br>interaction | 3,526          |
| Chronic persistent<br>pain | Smoking<br>status | 0.731          | No significant<br>interaction | 3,526          |
| Chronic persistent<br>pain | Alcohol use       | 0.650          | No significant<br>interaction | 3,526          |
| Chronic persistent<br>pain | Sleep duration    | 0.185          | No significant<br>interaction | 3,526          |
| Persistent waist pain      | Age               | 0.773          | No significant<br>interaction | 3,526          |
| Persistent waist pain      | Smoking<br>status | 0.608          | No significant<br>interaction | 3,526          |
| Persistent waist pain      | Alcohol use       | 0.186          | No significant                | 3,526          |

| Pain Phenotype        | Effect Modifier   | LRT<br>P-value | Interpretation                | Sample<br>Size |
|-----------------------|-------------------|----------------|-------------------------------|----------------|
|                       |                   |                | interaction                   |                |
| Persistent waist pain | Sleep duration    | 0.656          | No significant<br>interaction | 3,526          |
| Pain state trajectory | Age               | 0.455          | No significant<br>interaction | 3,526          |
| Pain state trajectory | Smoking<br>status | 0.223          | No significant<br>interaction | 3,526          |
| Pain state trajectory | Alcohol use       | 0.311          | No significant<br>interaction | 3,526          |
| Pain state trajectory | Sleep duration    | 0.422          | No significant<br>interaction | 3,526          |
| Pain severity level   | Age               | 0.445          | No significant<br>interaction | 3,526          |
| Pain severity level   | Smoking<br>status | 0.651          | No significant<br>interaction | 3,526          |
| Pain severity level   | Alcohol use       | 0.909          | No significant<br>interaction | 3,526          |
| Pain severity level   | Sleep duration    | 0.633          | No significant<br>interaction | 3,526          |

**Footnote:**LRT = Likelihood Ratio Test. All interaction tests were non-significant ( $p > 0.05$ ), indicating consistent associations between pain phenotypes and CVD risk across different levels of age, smoking status, alcohol use, and sleep duration.

**Supplementary Table S4: Variance Inflation Factors (VIF) for Covariates in the Fully Adjusted Model (Model 3)**

| Variable     | GVIF | Df | $GVIF^{1/(2 \times Df)}$ |
|--------------|------|----|--------------------------|
| Chronic_Pain | 1.16 | 1  | 1.08                     |
| Age          | 1.34 | 1  | 1.16                     |

| Variable          | GVIF | Df | $GVIF^{1/(2 \times Df)}$ |
|-------------------|------|----|--------------------------|
| Menopause_year    | 1.03 | 1  | 1.01                     |
| Education         | 1.37 | 2  | 1.08                     |
| marital           | 1.22 | 1  | 1.10                     |
| Location          | 1.27 | 1  | 1.13                     |
| Smoking           | 1.02 | 1  | 1.01                     |
| Drinking          | 1.03 | 1  | 1.02                     |
| BMI               | 1.16 | 1  | 1.07                     |
| Sleep_lunch_hours | 1.04 | 1  | 1.02                     |
| Sleep_hours       | 1.16 | 1  | 1.07                     |
| Hypertension      | 1.13 | 1  | 1.06                     |
| Diabetes          | 1.10 | 1  | 1.05                     |
| Stroke            | 1.05 | 1  | 1.02                     |
| Dyslipidemia      | 1.12 | 1  | 1.06                     |
| Depression        | 1.59 | 30 | 1.01                     |

\*Note: GVIF = Generalized Variance Inflation Factor; Df = Degrees of freedom. All  $GVIF^{1/(2 \times Df)}$  values are well below the conventional threshold of 5, indicating no concerning multicollinearity.\*
